# Supplementary material for: Food additive “lauric acid” possess non-toxic profile on biochemical, haematological and histopathological studies in female Sprague Dawley (SD) rats
Source: PeerJ. 2020 Mar 31;8:e8805. doi: 10.7717/peerj.8805 (PMC7120040; doi:10.7717/peerj.8805)
Supplement: Data S1 [file peerj-08-8805-s001.xlsx]

## Sheet: Body weight
Groups	Rat no	Fasting weight	Days
			D1	D2	D3	D4	D5	D6	D7	Difference in weight	% body weightt change	D8	D	D10	D11	D12	D13	D14	Difference in weight	% body weight change
Normal Control	R1	240.25	240.25	247	248.99	2.51.14	251.44	253.88	260	19.75	8.2206	262.22	265.15	274.14	275.66	276	277.14	278.31	38.06	15.8418
	R2	245.11	245.11	248.24	255.63	257.69	260.85	263.44	265	19.89	8.11472	266.17	268.22	270.79	272.18	275	277.77	282	36.89	15.0504
	R3	242.4	242.4	250.84	253	255.65	255	258.22	260.55	18.15	7.48762	261	263.22	265.11	266.84	270.98	273.41	278.88	36.48	15.0495
	R4	245	247.42	251.94	255	259.16	260.3	260.99	262	17	6.93878	266.66	269.65	271.61	274	275.57	277	280	35	14.2857
	R5	246.2	245.33	249.1	253.9	255	260.82	265.38	265	18.8	7.63607	268.99	270.65	273.94	276.35	277.33	278.12	282.22	36.02	14.6304
	R6	249.34	251.65	254.33	255.1	258.2	260	266	268	18.66	7.48376	270.04	272.22	273.18	275.88	277.11	278.94	284.31	34.97	14.025
Group1 LA 300 mg/kg	R1	248.14	248.14	254.11	259.33	263.01	268.65	270.15	267.56	19.42	7.82623	269.74	272.49	274.11	277.29	280	285.34	286.33	38.19	15.3905
	R2	242.29	242.29	262	268.68	267.85	261.25	257.5	261.11	18.82	7.76755	266.86	267.16	270.97	272.99	274.44	279.38	281	38.71	15.9767
	R3	250	252	273.56	270.06	270.15	276.3	267.95	268.34	18.34	7.336	271.13	375.99	277.98	278	280.1	281.61	285.55	35.55	14.22
	R4	250.64	254.18	255.01	259.91	260.22	259.99	262.87	269	18.36	7.32525	270.12	275	277.91	279.89	280	281.48	286.34	35.7	14.2435
	R5	247.28	247.28	254.31	255.07	258	259.99	263.33	266	18.72	7.57037	289.05	289.93	285.88	281.25	276.43	281.07	284.47	37.19	15.0396
	R6	246.88	246.88	250	254.01	255	257.99	261.51	265	18.12	7.3396	266.66	269.38	272.21	274.63	277.29	279.91	283.33	36.45	14.7643
Group 2 LA 2000 mg/kg	R1	244	243.88	245.99	250.33	251.94	255	259.58	263.82	19.82	8.12295	260	263.34	269.99	271.11	276.66	277.42	280.16	36.16	14.8197
	R2	237.26	238.11	240	243.99	245.31	246.59	250.14	255.34	18.08	7.62033	257.26	261.45	263.97	267.77	269.18	274.34	275	37.74	15.9066
	R3	243.6	243.89	245.91	247.1	248.45	256.41	260.33	261.38	17.78	7.29885	265.55	267.77	269.09	270	275.08	277.15	281.11	37.51	15.3982
	R4	244.5	246.37	247.22	250.04	254.45	256.31	258.36	261.91	17.41	7.12065	263.33	265.18	267.34	266.17	270.93	276.86	279.99	35.49	14.5153
	R5	247.05	248.37	249	251.95	258	259.32	261.04	265	17.95	7.26574	266.17	269.34	270.08	274.14	279.86	282. 08	284.81	37.76	15.2844
	R6	250	255.55	261.75	263.84	268.25	270.7	268.43	269.99	19.99	7.996	269.79	272.68	273.39	275	277.38	283.38	285.08	35.08	14.032

## Sheet: Food and water -intake
Day	Normal Control		LA 300 mg/kg		LA 2000 mg/kg
	Food	Water	Food (g)	water	Food	Water
D1	135.52	210	145	220	145.37	130
D2	140	195	135.46	235	133.33	140
D3	145.33	170	140	220	140.44	120
D4	138.08	240	160.66	245	116.31	270
D5	136	210	166.24	225	135.67	260
D6	130.55	220	124.44	160	129.94	250
D7	129.02	185	180.87	175	135.84	235
Week 2nd
D8	123.31	195	155.84	180	149.37	195
D9	160	205	115 28	165	139.39	195
D10	145.47	180	145	175	135.55	170
D11	139.64	180	135	160	155.15	180
D12	122.71	190	135.68	180	118.86	210
D13	145.37	175	140	175	145	190
D14	140	165	150	175	155	170
	#VALUE!
	1931	2720	1914.19	2690	1935.22	2715
Codes for week			Food	Water	weeks
1=week1			135.52	210	1
2=week2			140	195	1
			145.33	170	1
			138.08	240	1
			136	210	1
			130.55	220	1
			129.02	185	1
			123.31	195	2
			160	205	2
			145.47	180	2
			139.64	180	2
			122.71	190	2
			145.37	175	2
			140	165	2
			145	220	1
			135.46	235	1
			140	220	1
			160.66	245	1
			166.24	225	1
			124.44	160	1
			180.87	175	1
			155.84	180	2
			115 28	165	2
			145	175	2
			135	160	2
			135.68	180	2
			140	175	2
			150	175	2
			145.37	130	1
			133.33	140	1
			140.44	120	1
			116.31	270	1
			135.67	260	1
			129.94	250	1
			135.84	235	1
			149.37	195	2
			139.39	195	2
			135.55	170	2
			155.15	180	2
			118.86	210	2
			145	190	2
			155	170	2

## Sheet: Harvested organs weight
	Group	Rat no	Adrenal Left			Adrenal right			BRAIN			EYE left			Eye Right			HEART			KIDNEY left			KIDNEY Right			LIVER			lung			Ovary left			Overy Right			PANCREASE			SPLEEN			Stomach			Urinary Bladder
			Absulute .Weight (g)	Body weight at sacrifice (g)	Relative weight of organ (g)	Ab. Weight (g)	Body weight at sacrifice (g)	Relative weight of organ (g)	Ab. Weight (g)	Body weight at sacrifice (g)	Relative weight of organ (g)	Ab. Weight (g)	Body weight at sacrifice (g)	Relative weight of organ (g)	Ab. Weight (g)	Body weight at sacrifice (g)	Relative weight of organ (g)	Ab. Weight (g)	Body weight at sacrifice (g)	Relative weight of organ (g)	Ab. Weight (g)	Body weight at sacrifice (g)	Relative weight of organ (g)	Ab. Weight (g)	Body weight at sacrifice (g)	Relative weight of organ (g)	Ab. Weight (g)	Body weight at sacrifice (g)	Relative weight of organ (g)	Ab. Weight (g)	Body weight at sacrifice (g)	Relative weight of organ (g)	Ab. Weight (g)	Body weight at sacrifice (g)	Relative weight of organ (g)	Ab. Weight (g)	Body weight at sacrifice (g)	Relative weight of organ (g)	Ab. Weight (g)	Body weight at sacrifice (g)	Relative weight of organ (g)	Ab. Weight (g)	Body weight at sacrifice (g)	Relative weight of organ (g)	Ab. Weight (g)	Body weight at sacrifice (g)	Relative weight of organ (g)	Ab. Weight (g)	Body weight at sacrifice (g)
	Normal control	R1	0.07	278.31	0.019	0.07	278.31	0.0251518	1.83	278.31	0.65754	0.11	278.31	0.0395243	0.12	278.31	0.0431174	0.78	278.31	0.280263	0.75	278.31	0.269484	0.8	278.31	0.287449	8.4	278.31	3.01822	1.31	278.31	0.470698	0.08	278.31	0.0287449	0.09	278.31	0.032338	0.87	278.31	0.312601	0.66	278.31	0.237146	2.16	278.31	0.776113	0.1	278.31
		R2	0.05	282	0.0177305	0.06	282	0.0212766	1.69	282	0.599291	0.12	282	0.0425532	0.12	282	0.0425532	0.83	282	0.294326	0.81	282	0.287234	0.8	282	0.283688	8.85	282	3.1383	1.34	282	0.475177	0.07	282	0.0248227	0.08	282	0.0283688	0.8	282	0.283688	0.69	282	0.244681	1.93	282	0.684397	0.1	282
		R3	0.05	278.88	0.0179289	0.04	278.88	0.0143431	1.9	278.88	0.681297	0.11	278.88	0.0394435	0.12	278.88	0.0430293	0.74	278.88	0.265347	0.85	278.88	0.304791	0.85	278.88	0.304791	7.53	278.88	2.70009	1.46	278.88	0.523523	0.12	278.88	0.0430293	0.11	278.88	0.0394435	0.69	278.88	0.247418	0.62	278.88	0.222318	2.58	278.88	0.925129	0.12	278.88
		R4	0.06	280	0.0214286	0.07	280	0.025	1.86	280	0.664286	0.12	280	0.0428571	0.13	280	0.0464286	0.78	280	0.278571	0.8	280	0.285714	0.81	280	0.289286	7.48	280	2.67143	1.45	280	0.517857	0.09	280	0.0321429	0.1	280	0.0357143	1.03	280	0.367857	0.62	280	0.221429	2.14	280	0.764286	0.1	280
		R5	0.05	282.22	0.0177167	0.05	282.22	0.0177167	1.72	282.22	0.609454	0.12	282.22	0.04252	0.12	282.22	0.04252	0.71	282.22	0.251577	0.78	282.22	0.27638	0.75	282.22	0.26575	9.39	282.22	3.32719	1.21	282.22	0.428744	0.06	282.22	0.02126	0.07	282.22	0.0248033	0.73	282.22	0.258663	0.55	282.22	0.194883	1.67	282.22	0.591737	0.11	282.22
		R6	0.05	284.31	0.0175864	0.06	284.31	0.0211037	1.85	284.31	0.650698	0.11	284.31	0.0386902	0.12	284.31	0.0422074	0.84	284.31	0.295452	0.82	284.31	0.288418	0.86	284.31	0.302487	8.63	284.31	3.03542	1.26	284.31	0.443178	0.12	284.31	0.0422074	0.11	284.31	0.0386902	0.8	284.31	0.281383	0.58	284.31	0.204003	2.24	284.31	0.787872	0.1	284.31
	LA 300mg/kg	R1	0.04	286.33	0.017	0.04	286.33	0.0139699	1.97	286.33	0.688017	0.12	286.33	0.0419097	0.13	286.33	0.0454022	0.76	286.33	0.265428	0.81	286.33	0.28289	0.9	286.33	0.314323	8.64	286.33	3.0175	1.44	286.33	0.502916	0.11	286.33	0.0384172	0.13	286.33	0.0454022	1.26	286.33	0.440052	0.6	286.33	0.209548	2.87	286.33	1.00234	0.15	286.33
		R2	0.06	281	0.0213523	0.05	281	0.0177936	1.38	281	0.491103	0.11	281	0.0391459	0.13	281	0.0462633	0.8	281	0.284698	0.92	281	0.327402	0.84	281	0.298932	7.49	281	2.66548	1.21	281	0.430605	0.08	281	0.0284698	0.1	281	0.0355872	1.06	281	0.377224	0.58	281	0.206406	2.04	281	0.725979	0.1	281
		R3	0.05	285.55	0.0175101	0.06	285.55	0.0210121	1.81	285.55	0.633864	0.14	285.55	0.0490282	0.12	285.55	0.0420242	0.83	285.55	0.290667	0.78	285.55	0.273157	0.78	285.55	0.273157	9.77	285.55	3.42147	1.37	285.55	0.479776	0.08	285.55	0.0280161	0.05	285.55	0.0175101	0.87	285.55	0.304675	0.53	285.55	0.185607	1.73	285.55	0.605848	0.11	285.55
		R4	0.06	286.34	0.0209541	0.05	286.34	0.0174618	1.83	286.34	0.6391	0.12	286.34	0.0419082	0.12	286.34	0.0419082	0.79	286.34	0.275896	0.95	286.34	0.331773	0.94	286.34	0.328281	9.32	286.34	3.25487	1.42	286.34	0.495914	0.1	286.34	0.0349235	0.12	286.34	0.0419082	0.74	286.34	0.258434	0.53	286.34	0.185095	1.47	286.34	0.513376	0.14	286.34
		R5	0.05	284.47	0.0175765	0.07	284.47	0.0246072	1.91	284.47	0.671424	0.12	284.47	0.0421837	0.13	284.47	0.045699	0.89	284.47	0.312863	0.82	284.47	0.288255	0.8	284.47	0.281225	7.44	284.47	2.61539	1.27	284.47	0.446444	0.1	284.47	0.0351531	0.09	284.47	0.0316378	1.26	284.47	0.442929	0.74	284.47	0.260133	2.32	284.47	0.815552	0.1	284.47
		R6	0.07	283.33	0.022	0.05	283.33	0.0176473	1.8	283.33	0.635302	0.12	283.33	0.0423534	0.12	283.33	0.0423534	0.89	283.33	0.314121	0.85	283.33	0.300004	0.82	283.33	0.289415	7.19	283.33	2.53768	1.31	283.33	0.462358	0.07	283.33	0.0247062	0.08	283.33	0.0282356	0.94	283.33	0.331769	0.6	283.33	0.211767	2.58	283.33	0.910599	0.1	283.33
	LA 2000 mg/kg	R1	0.05	280.16	0.0178469	0.06	280.16	0.0214163	1.89	280.16	0.674615	0.12	280.16	0.0428327	0.13	280.16	0.0464021	0.75	280.16	0.267704	0.9	280.16	0.321245	0.8	280.16	0.285551	9.53	280.16	3.40163	1.51	280.16	0.538978	0.13	280.16	0.0464021	0.12	280.16	0.0428327	0.92	280.16	0.328384	0.52	280.16	0.185608	1.64	280.16	0.58538	0.1	280.16
		R2	0.07	275	0.0254545	0.05	275	0.0181818	1.83	275	0.665455	0.13	275	0.0472727	0.14	275	0.0509091	0.78	275	0.283636	0.77	275	0.28	0.79	275	0.287273	7.38	275	2.68364	1.42	275	0.516364	0.05	275	0.0181818	0.07	275	0.0254545	0.84	275	0.305455	0.48	275	0.174545	3.332	275	1.21164	0.12	275
		R3	0.05	281.11	0.0177866	0.05	281.11	0.0177866	1.95	281.11	0.693679	0.11	281.11	0.0391306	0.12	281.11	0.0426879	0.84	281.11	0.298815	0.73	281.11	0.259685	0.72	281.11	0.256127	8.21	281.11	2.92056	1.28	281.11	0.455338	0.12	281.11	0.0426879	0.1	281.11	0.0355733	0.75	281.11	0.266799	0.57	281.11	0.202768	2.3	281.11	0.818185	0.1	281.11
		R4	0.05	279.99	0.0178578	0.06	279.99	0.0214293	1.69	279.99	0.603593	0.14	279.99	0.0500018	0.14	279.99	0.0500018	0.8	279.99	0.285724	0.71	279.99	0.25358	0.75	279.99	0.267867	7.81	279.99	2.78939	1.37	279.99	0.489303	0.09	279.99	0.032144	0.1	279.99	0.0357156	0.89	279.99	0.317868	0.6	279.99	0.214293	3	279.99	1.07147	0.08	279.99
		R5	0.06	284.81	0.0210667	0.05	284.81	0.0175556	1.65	284.81	0.579334	0.12	284.81	0.0421334	0.12	284.81	0.0421334	0.86	284.81	0.301956	0.76	284.81	0.266845	0.77	284.81	0.270356	9.33	284.81	3.27587	1.48	284.81	0.519645	0.08	284.81	0.0280889	0.09	284.81	0.0316	0.65	284.81	0.228222	0.57	284.81	0.200133	2.32	284.81	0.814578	0.11	284.81
		R6	0.05	285.08	0.0175389	0.05	285.08	0.0175389	1.65	285.08	0.578785	0.13	285.08	0.0456012	0.12	285.08	0.0420934	0.79	285.08	0.277115	0.85	285.08	0.298162	0.82	285.08	0.287639	7.18	285.08	2.51859	1.41	285.08	0.494598	0.09	285.08	0.0315701	0.08	285.08	0.0280623	1.12	285.08	0.392872	0.55	285.08	0.192928	3.23	285.08	1.13302	0.11	285.08
[truncated: 7 more columns]

## Sheet: Hematology results
Group	Rat no	RBC ( X10^12/L)	HAEMOGLOBIN (G/DL)	PCV(HCT) ( %)	MCV ( FL)	MCH (PG)	MCHC (G/DL)	PLATELET COUNT ( X10^12/L)	WBC ( X10^12/L)	NEUTROPHIL %	LYMPHOCYTE %	MONOCYTE %	EOSINOPHIL%	BASOPHIL %	ATYPICAL LYMPHOCYTE %
Normal control	R1	7.2	13.5	44	59	18	31	1025	3.5	25	73	4	3	0	0
	R2	7.3	13.8	43	19	17	31	950	3.9	30	68	6	2	0	0
	R3	7.1	13.7	45	59	19	32	830	3.3	29	63	3	3	0	0
	R4	7.6	13.9	46	60	17	32	955	3.8	27	64	5	2	0	0
	R5	7.4	13.5	44	57	18	30	1010	4.1	15	60	6	2	0	0
	R6	7.5	13.9	46	60	19	32	950	4.7	18	56	2	3	0	0
LA 300 mg/kg	R1	7.2	13.8	0.43	60	19	32	908	4.5	12	79	6	3	0	0
	R2	7.1	13.6	43	60	19	32	1125	5.8	33	63	2	2	0	0
	R3	7.8	13.7	43	56	18	32	206	2.3	23	73	2	2	0	0
	R4	8.7	14.8	46	54	17	32	1176	3.6	29	67	2	2	0	0
	R5	7.4	13.4	44	57	16	31	1015	2.9	25	61	5	3	0	0
	R6	7.5	13.4	45	58	17	30	760	4.1	31	63	4	2	0	0
LA 2000mg/kg	R1	7.8	13.9	45	57	18	31	958	3.1	36	60	2	2	0	0
	R2	7.4	13.6	46	62	18	30	605	3.9	30	65	3	2	0	0
	R3	7.8	13.6	43	55	18	32	753	2.2	39	56	3	2	0	0
	R4	7.9	14.3	46	59	18	31	809	5.1	36	60	2	2	0	0
	R5	7.4	13.7	44	56	16	32	1025	3.6	25	62	6	3	0	0
	R6	7.7	13.9	43	55	17	31	930	3.3	29	68	5	3	0	0

## Sheet: Biochemical parameters results 
Group	Rat no	KIDNEY FUNCTION TESTS (MMOL/L)								LIPID PROFILE (MMOL/L)					LIVER FUNCTION TESTS
		UREA	CREATININE	CALCIUM	INORGANIC PHOSPHATE	URIC ACID	SODIUM	POTASSIUM	CHLORIDE	TOTAL CHOLESTROL	HDL CHOLESTROL	LDL CHOLESTROL	TRIGLYCERIDES	TOTAL/HDL RATIO	TOTAL PROTIEN (G/L)	ALBUMIN (G/L)	GLOBULIN (G/L)	A/G RATIO	TOTAL BILIROBIN (UMOL/L)	ALKALINE PHOSPHATE (IU/L)	SGOT (AST) (IU/L)	SGPT (ALT) (IU/L)	GGT (IU/L)
Normal Control	R1	7.6	30	2.49	3.5	0.04	144	5.7	98	2.4	0.71	0.5	1.8	3.6	74	47	25	1.8	1	57	156	35	0
	R2	5.6	35	2.5	2.9	0.09	145	5.4	99	2.7	0.69	0.9	1.5	3.7	69	45	23	1.9	1	55	165	40	0
	R3	5.8	44	2.49	2.73	0.1	148	5.8	97	1.8	0.68	1	1.7	3.4	70	46	24	1.7	1	49	180	36	0
	R4	8.1	35	2.5	3.12	0.15	143	5.4	99	1.9	0.59	1.01	1.6	3.3	69	39	25	1.8	1	45	176	38	0
	R5	6.8	39	2.65	3.65	0.09	147	5.5	100	1.5	0.57	1	2.1	3.1	75	36	26	1.9	1	55	154	35	0
	R6	5.9	33	2.55	3.27	0.8	143	5.6	98	1.9	0.5	0.8	2	3.2	68	40	23	1.7	1	61	160	36	0
LA 300 mg/kg	R1	8	34	2.65	2.3	0.15	144	5.9	99	2.7	0.71	1	2.1	3.8	74	49	25	2	1	50	229	34	0
	R2	5.9	30	2.36	3.72	0.09	145	6.7	98	2.7	0.66	1.4	1.3	4.1	73	47	26	1.8	1	39	213	40	0
	R3	5.8	38	2.55	4.09	0.05	146	5.7	99	1.8	0.54	0.4	1.8	3.3	71	45	26	1.7	1	73	448	38	0
	R4	7.3	37	2.56	3.62	0.06	145	5.8	95	2.9	0.77	1.3	1.8	3.8	76	49	27	1.8	1	57	183	39	0
	R5	6.8	31	2.49	3.67	0.17	148	5.9	101	1.9	0.56	0.8	1	3.1	68	39	24	1.7	1	63	163	35	0
	R6	8	3	2.39	3.01	0.12	147	5.4	102	1.8	0.6	0.7	0.9	3	67	38	24	1.8	1	61	165	30	0
LA 2000 mg/k	R1	8.3	44	2.5	4.78	0.07	148	5.7	101	2.1	0.6	1.3	0.4	3.5	69	46	23	2	1	64	403	79	0
	R2	9.4	37	2.28	4	0.08	146	5.9	101	1.5	0.45	0.2	1.9	3.3	62	39	23	1.7	1	113	162	31	0
	R3	8	42	2.44	3.27	0.18	147	5.4	104	1.9	0.53	1	0.8	3.6	70	46	24	1.9	1	50	164	33	0
	R4	9.8	38	2.5	4.16	0.07	146	5.4	99	1.8	0.56	0.4	1.9	3.2	70	46	24	1.9	1	83	193	30	0
	R5	6.9	30	2.3	3.54	0.09	142	5.9	100	2.4	0.71	0.7	1	3.7	62	42	23	1.7	1	49	160	32	0
	R6	6.8	31	2.4	3.65	0.1	143	5.4	98	2.1	0.69	0.8	0.7	3.1	68	41	25	1.8	1	51	165	38	0
